# Supplementary material
Source: Research Square preprint supplement (doi:10.21203/rs.3.rs-8361693/v1)
Supplement: Supplementary file 1 [file 27bbd47862cf48a6d322dfe9.docx]

In order to explore the complex relationship among SSME, SWB and FI, hierarchical regression analysis was used to solve the different research problems step by step. To be specific, Model 1 analyzed baseline associations between control variables (age, education, income) and FI; Model 2 included centralized SSME to assess their independent effects on FI; Model 3 introduced moderating variables (household registration, gender) and SWB to analyze the interaction between structural inequality and affective factors; Model 4 included SSME × household registration, SSME × gender interactions to test institutional moderating effects ([Wen et al., 2005](#Wenzhonglin2005)). To examine the mediating effect of SWB, we used 1000 resampling ([Wen & Ye, 2014](#WenandYe2014)). Meanwhile, we divide SWB into four groups: "low SWB","moderate SWB","high SWB" and "very high SWB", and investigate whether there is a mediating path between different groups to determine the "threshold effect" of SWB in the impact of SSME on FI.

All effect sizes are calculated as follows: (1) For adjustment effect size calculations, calculated by percentage decay or enhancement

；

(2)To test for mediating effects, we decompose the total effect *()* into two parts: direct effects*(')*and indirect paths through mediating variables

;

(3)We use a stratified approach to calculate the contribution of institutional factors to the outcome:

*()*

where the main effect of social mobility expectations contributes were

.

In addition, continuous variables were normalized to facilitate comparison of the influence of different variables.

SPSS software was used for analysis, including stratified regression, descriptive statistics, and mediation analysis. Cross-sectional data describe the situation well, but are not strong enough to prove causation.

We solve this problem in three ways: (1) Use institutional externality to represent causation. Hukou and gender are key institutional variables because people cannot change them at will, and they exist before fertility intentions are formed. (2) Expectations of social mobility are forward-looking indicators that measure the difference between current social class perceptions and future expectations of social classes, and that exist before childbearing intentions are formed. (3) Our "institutional embeddedness model" may suggest that China's hukou system and gender norms have influenced people's cognition before the formation of fertility intention. The hukou system creates "institutional instability"([Wu & KC, 2022](#Wu)), and gender norms require "emotional labor" ([Tropman et al., 1984](#Tropman)). These factors collectively influence perceptions even before the emergence of the intention to procreate.
