# Supplementary material
Source: Research Square preprint supplement (doi:10.21203/rs.3.rs-8361693/v1)
Supplement: Supplementary file 2 [file e12fe2a0512f02567f3d1f70.docx]

**Replication Package – “Institutional Embeddedness and Fertility Intentions in China”**

Author ORCID: 0009-0005-6322-7741

Software: SPSS 26 (Windows, English interface)

A. Data source

1. Chinese General Social Survey (CGSS) 2012, 2015, 2017, 2018, 2021 waves.

2. Download: http://cgss.ruc.edu.cn/ → “Data Download” → free registration → choose Stata/SAS/SPSS format.

3. File names after extraction: CGSS2012.sav, CGSS2015.sav … CGSS2021.sav

B. Merging sequence (menu path)

1. File → Open → Data → choose CGSS2012.sav.

2. Data → Add Cases → select CGSS2015.sav → click“Add”→ repeat for 2017/2018/2021.

3. Save as CGSS_2012-2021_merged.sav

C. Sample selection (point-and-click)

1. Data → Select Cases →“If condition is satisfied”→ paste:

AGE >= 20 & AGE <= 40 & !MISSING(FERTNUM) & !MISSING(SME) & !MISSING(HUKOU) & !MISSING(GENDER)

1. Output: n = 11 594 (20–40 y)

D.Variable construction (match Table 1 in manuscript)

| **Variable** | **SPSS syntax (point-and-click)** |
| --- | --- |
| Fertility intention (DV) | Transform → Recode into Same Variable: FERTNUM |
| 0 thru 5 → Copy; 6 thru Highest → SYSMIS |  |
| Social mobility expected (IV) | Compute SME_diff = Q1204 - Q1203. |
| Transform → Recode into Different Variable: |  |
| Lowest thru -1 → 1; 0 → 2; 1 → 3; 2 → 4; 3 thru Highest → 5. |  |
| Name new variable SME_ord. |  |
| Centered continuous (for interactions) | Transform → Compute: SME_c = SME_diff - 0.08. |
| (sample mean ≈ 0.08, used only for interaction terms) |  |
| Hukou (Moderator) | Transform → Recode into Same Variable: |
| 1 & 3 → 1 “rural”; 2 & 4 & 5 → -1 “non-rural”. |  |
| Gender (Moderator) | Transform → Recode: 1 male→1; 2 female→-1. |
| SWB (Mediator) | Transform → Recode: 1-2→1; 3→2; 4→3; 5→4. |
| Controls | AGE (continuous); EDU (0-13); LNINCOME (ln annual+1, 1 % winsorise). |

E. Interaction terms

Transform → Compute:

SME_c_HUKOU = SME_c * HUKOU

SME_c_GENDER = SME_c * GENDER

F. Analysis menus

1 Analyze → Regression → Linear

Block 1: AGE EDU LNINCOME

Block 2: SME_c

Block 3: HUKOU GENDER SWB

Block 4: SME_c_HUKOU SME_c_GENDER

2 Mediation: Analyze → Regression → PROCESS (or default)

Model 4, IV=SME_c, Mediator=SWB, DV=FERTNUM, 1 000 bootstrap.

G. Reproducibility

All coefficients can be replicated by following the exact menu paths above; no plug-ins required except PROCESS.
